# Supplementary material for: The Mycobacterium smegmatis HesB Protein, MSMEG_4272, Is Required for In Vitro Growth and Iron Homeostasis
Source: MDPI journal article supplement (doi:10.3390/microorganisms11061573), 2023-06-14
Supplement: s1 [file s1]

## Supplementary Materials:

**Table S1:** Strains and plasmids used in this study.

| Strain Names        | Description                                                                                                                                                                                               | Source or reference        |
|---------------------|-----------------------------------------------------------------------------------------------------------------------------------------------------------------------------------------------------------|----------------------------|
| mc <sup>2</sup> 155 | <i>M. smegmatis</i> strain (ATCC: 700084)                                                                                                                                                                 | SB Snapper PubMed: 2082148 |
| 4272ID              | <i>M. smegmatis</i> mc <sup>2</sup> 155 mutant in which chromosomally encoded MSMEG_4272 is fused to a C-terminal ID-tagged                                                                               | This study                 |
| 4272ID::HIV2Pr      | Derivative of the 4272ID strain containing the pMC1s::HIV2Pr vector; Km <sup>r</sup>                                                                                                                      | This study                 |
| WT::empty           | Derivative of <i>M. smegmatis</i> mc <sup>2</sup> 155 strain with the pLJR962 plasmid integrated at the attB site; Km <sup>r</sup>                                                                        | This study                 |
| WT::sgRNA           | Derivative of <i>M. smegmatis</i> mc <sup>2</sup> 155 strain with the pSG4272 plasmid integrated at the attB site; Km <sup>r</sup>                                                                        | This study                 |
| 4272ID::empty       | Derivative of the 4272ID strain with the pLJR962 plasmid integrated at the attB site; Km <sup>r</sup>                                                                                                     | This study                 |
| 4272ID::sgRNA       | Derivative of the 4272ID strain with the pSG4272 plasmid integrated at the attB site; Km <sup>r</sup>                                                                                                     | This study                 |
| Plasmid Names       | Description                                                                                                                                                                                               | Source or reference        |
| p2NIL               | Cloning vector, oriE, Kan <sup>R</sup>                                                                                                                                                                    | Addgene plasmid 20188      |
| pGOAL17             | pBR322 derivative carrying marker genes (P <sub>Ag85</sub> -lacZ; P <sub>hsp60</sub> -sacB) flanked by two PacI sites. oriE, Amp <sup>R</sup>                                                             | Addgene plasmid 20189      |
| p2NIL4272LS         | Suicide delivery vector containing upstream and downstream homologous regions designed to introduce a 246 bp deletion into MSMEG_4272 and PacI cassette from pGOAL17; Km <sup>R</sup>                     | This study                 |
| pdacB_SsrA-tag      | Plasmid containing an ID-tag consisting of a myc-tag, a TB SsrA-tag, a HIV-2 protease cutting site, and a flag-tag flanked on the 5'- and 3'-ends by HindIII and SacI restriction sites, Kan <sup>R</sup> | Wei et al., 2011 [38]      |
| pJET_4272ssr        | pJET 2.1 Blunt derivative containing MSMEG_4272 and 300 bp upstream, accompanied by an ID-tag, Amp <sup>R</sup>                                                                                           | This study                 |
| pJET_4272ID         | pJET_4272ssr derivative, in which 881 bp of the MSMEG_4272 downstream region is fused to the C-terminal region of the ID-tag, Amp <sup>R</sup>                                                            | This study                 |
| pJET_4272_up        | pJET 2.1 Blunt derivative containing 1500 bp upstream of MSMEG_4272, Amp <sup>R</sup>                                                                                                                     | L. Ngakane                 |
| pN_4272ID           | p2NIL derivative, containing an ID-tagged MSMEG_4272, including 1500 bp upstream and 881 bp of the downstream region, Kan <sup>R</sup>                                                                    | This study                 |
| pNG4272ID           | Suicide delivery vector, pN_4272ID derivative containing lacZ and SacB selectable markers cloned into the PacI site, Kan <sup>R</sup>                                                                     | This study                 |
| pMC1s::WT-HIV2Pr    | Integrating mycobacterial vector, HIV-protease under the control of a tetracycline-responsive promoter, Km <sup>r</sup>                                                                                   | Wei et al., 2011 [38]      |

|         |                                                                                                                                                             |                              |
|---------|-------------------------------------------------------------------------------------------------------------------------------------------------------------|------------------------------|
| pLJR962 | Integrating mycobacterial vector, Sth1 dCas9 under the control of a tetracycline-responsive promoter, Km <sup>r</sup> , L5 Int attP for <i>M. smegmatis</i> | [47], Addgene plasmid 115162 |
| pSG4272 | PLJR962 derivative containing the MS4272_CRISPRi directed sgRNA in the BsmBI restriction enzyme site. Km <sup>r</sup>                                       | T. de Wet                    |

Table S2: Primers used in this study.

| Primer name | Sequence (5' – 3') *              | Binding site                                                                  | Product                                                                                                                                                                                |
|-------------|-----------------------------------|-------------------------------------------------------------------------------|----------------------------------------------------------------------------------------------------------------------------------------------------------------------------------------|
| S4272UF     | CAGGATCCGTCATGTCGGCTCCTTCAC       | 1481 bp upstream of the start of <i>MSMEG_4272</i>                            | 1500 bp upstream homologous region used for <i>MSMEG_4272</i> knock-out construct (p2NIL4272LS)                                                                                        |
| S4272UR     | CGAATTCGCGTCCTGAACAGTCAT          | 19 bp downstream of the start of <i>MSMEG_4272</i>                            |                                                                                                                                                                                        |
| S4272DF     | CGAATTCGATCGACTTCGTCGACACCAT      | 93 bp from the 3'-end of <i>MSMEG_4272</i>                                    | 1578 bp downstream homologous region                                                                                                                                                   |
| S4272DR     | GCAAGCTTATCCCACTCGTAGTCGTTGG      | 1485 bp downstream of the 3'-end of <i>MSMEG_4272</i>                         | used for <i>MSMEG_4272</i> knock-out construct (p2NIL4272LS)                                                                                                                           |
| Fw_4272_up  | CCATGCGTCCACGGCGGAATCCG-CAGCG     | 300 bp from the start of <i>MSMEG_4272</i>                                    | <i>MSMEG_4272</i> amplification, including 300 bp upstream of <i>MSMEG_4272</i> , and removal of the <i>MSMEG_4272</i> native stop codon; 15 bp overlap with ID-tag N-terminal region. |
| Rev_4272_ID | GATCAGCTTCTGCTCGTTGAA-GCTGTCGCC   | 3 bp from 3'-end of <i>MSMEG_4272</i> .                                       |                                                                                                                                                                                        |
| Fw_IDtag    | GAGCAGAAGCTGATCTCGGAG             | 5' – end of ID-tag in <i>dacB_SsrA</i> -tag.                                  | Amplifies ID-tag and introduces a C-terminal HindIII restriction site.                                                                                                                 |
| Rev_IDtag   | AAGCTTCTTGTCGTCGTCGTCCTT-GTAGTC   | 3' – end of ID-tag in <i>dacB_SsrA</i> -tag                                   |                                                                                                                                                                                        |
| F_ID_4272DS | ACGACGACGACAAGTGACGGCCGG-TACTGCTT | 24 bp downstream of <i>MSMEG_4272</i> coding region.                          | 860 bp downstream homologous region used for inserting ID-tag downstream of <i>MSMEG_4272</i> (pNG4272ID). Fragment used as a probe during Southern blotting procedure.                |
| R4272_881DS | GCGGCCCGCTGGCACCCCTTCATTGTTC      | 881 bp downstream of <i>MSMEG_4272</i> , introducing a NotI restriction site. |                                                                                                                                                                                        |
| 4272delF1   | TCTTGTCGTCGTCGTT-GTTC             | 266 bp upstream of the start of <i>MSMEG_4272</i>                             | Primers used to screen for <i>MSMEG_4272</i> deletion.                                                                                                                                 |
| 4272delR1   | AACAGGTTGTAGCGCAGACC              | 161 downstream of the start of <i>MSMEG_4272</i>                              | Wild type: 427 bp<br>Mutant: 791 bp                                                                                                                                                    |
| 4272delR2   | ACGCGATCCAGGAGTATCTG              | 414 bp downstream of the 3'-end of <i>MSMEG_4272</i>                          |                                                                                                                                                                                        |
| FMsmeg4272  | TCTTGTCGTCGTCGTTGTTC              | 226 bp upstream of <i>MSMEG_4272</i> gene sequence.                           | Primers used to screen for incorporation of ID-tag on the C-terminus of <i>MSMEG_4272</i> .                                                                                            |
| RMsmeg4272  | ACGCGATCCAGGAGTATCTG              | 414 bp downstream of <i>MSMEG_4272</i> gene sequence.                         | Wild type: 776 bp<br>Mutant: 857 bp                                                                                                                                                    |
| rtsmSiga-r1 | GTATCCCGGTGCATGGTC                | 1035 bp downstream of the start of <i>M. smegmatis</i> SigA                   | sigA-specific primer used for cDNA synthesis                                                                                                                                           |

|           |                      |                                                            |                                                                                     |
|-----------|----------------------|------------------------------------------------------------|-------------------------------------------------------------------------------------|
| RT_4272   | GTGGAAGTGTGCGCCGCAGG | 334 bp downstream of the start of <i>MSMEG_4272</i>        | <i>MSMEG_4272</i> -specific primer used for cDNA synthesis                          |
| RT4272-F2 | CGGTCTGCGCTACAACCTG  | 144 bp downstream from the start of <i>MSMEG_4272</i>      | qPCR primer: 178 bp product for quantitation of <i>MSMEG_4272</i> transcript levels |
| RT4272-R2 | GGCGTTGGGGTTGTCGATC  | 321 bp downstream of the start of <i>MSMEG_4272</i>        |                                                                                     |
| RTSIGA_F2 | ACCGCGCCAAAAACCATCTG | 680 bp downstream of the start of <i>M. smegmatis</i> SigA | qPCR primer: 80 bp product for quantitation of sigA transcript levels               |
| RTSIGA_R2 | TGGATGAGGTCGAGGAACGC | 760 bp downstream of the start of <i>M. smegmatis</i> SigA |                                                                                     |

\*Restriction enzyme sites used for cloning are underlined

Table S3: PCR screening results following two-step selection to generate Δ*MSMEG\_4272*

| Experiment | Colonies Screened | Wild-Type (WT) | SCOs | Mutant |
|------------|-------------------|----------------|------|--------|
| 1          | 27                | 16             | 11   | 0      |
| 2          | 50                | 12             | 38   | 0      |

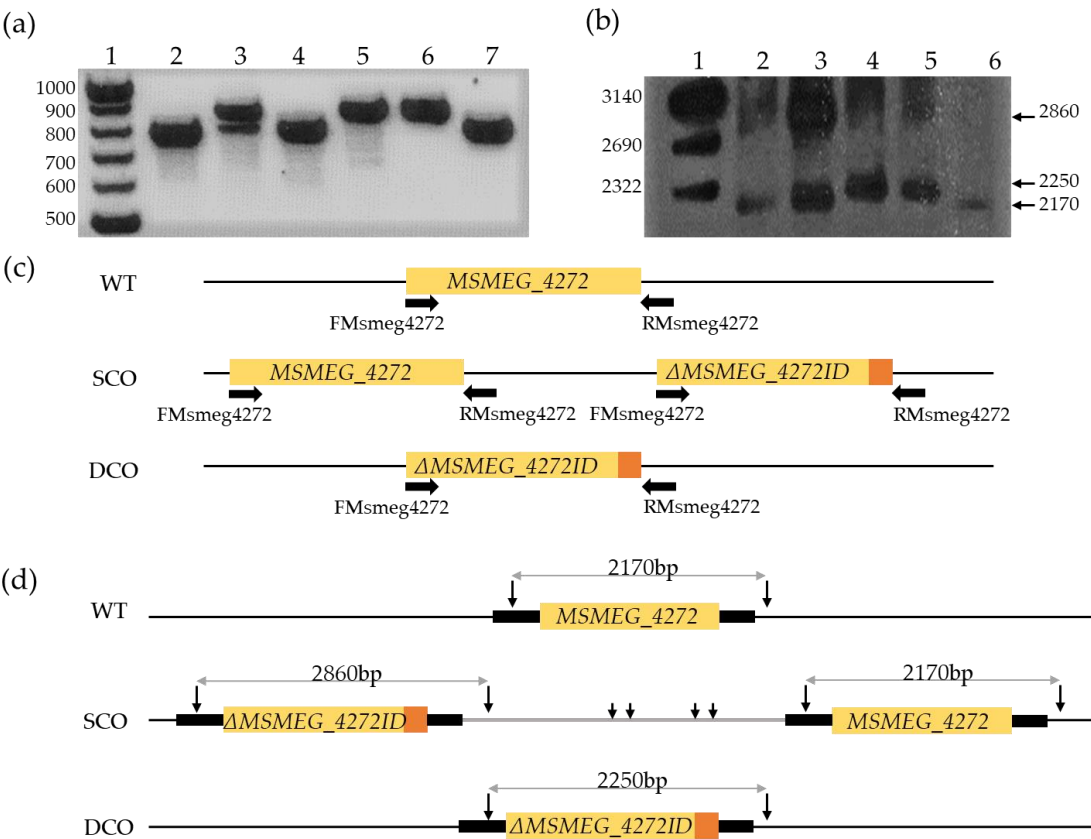

**Figure S1:** Confirmation of the *M. smegmatis* Δ*MSMEG\_4272ID* mutant strain genotypes. (a) Agarose gel electrophoresis of the colony PCR products for *M. smegmatis* mc<sup>2</sup>155 (lane 2), 4272ID SCO (lane 3) and the potential 4272ID DCO mutants (lane 4 –7). (b) Southern blot analysis: *M. smegmatis* mc<sup>2</sup>155 (lane 2 & 6), 4272ID SCO (lane 3), and two 4272ID DCO's (lane 4 & 5). (c) PCR screening approach to differentiate between the Δ*MSMEG\_4272ID* mutant allele (857bp) and the *MSMEG\_4272* wild-type reverted allele (776bp). Arrows indicate the binding region of primers (binding of specific primers are indicated) (d) Graphical presentation of the strategy for Southern blot genotype for *M. smegmatis*

mc<sup>2</sup>155 (WT), *M. smegmatis* SCO, and *M. smegmatis* DCO mutants. Arrows indicate the cut sites of the restriction enzyme site, PvuII. The MSMEG\_4272 downstream region, amplified with F\_ID\_4272DS and R4272\_881DS, was used as a probe during southern blotting. The gene sizes are not illustration to scale.

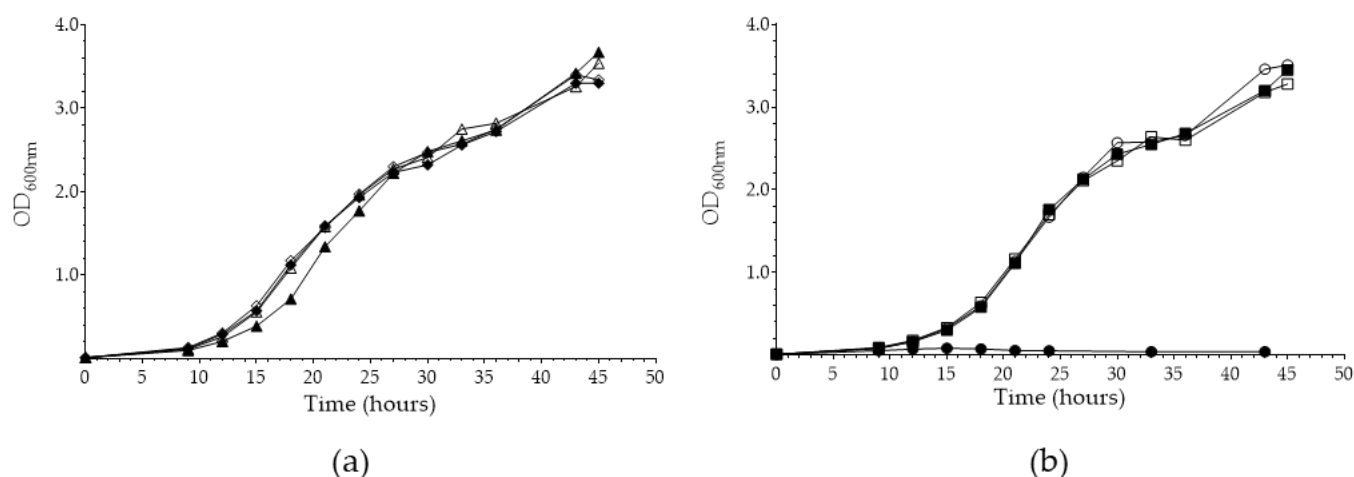

**Figure S1:** Optimization of growth for CRISPRi mediated *MSMEG\_4272* gene silencing in *M. smegmatis* strains under standard culture conditions. (a) Growth of WT::empty, with and without Atc (solid & open diamond, respectively), and WT::sgRNA, with and without Atc (solid & open triangle, respectively). (b) Growth of 4272ID::empty, with and without Atc (solid & open square, respectively), and 4272ID::sgRNA, with and without Atc (solid & open circle, respectively). Data (A & B) represents one biological replicate.

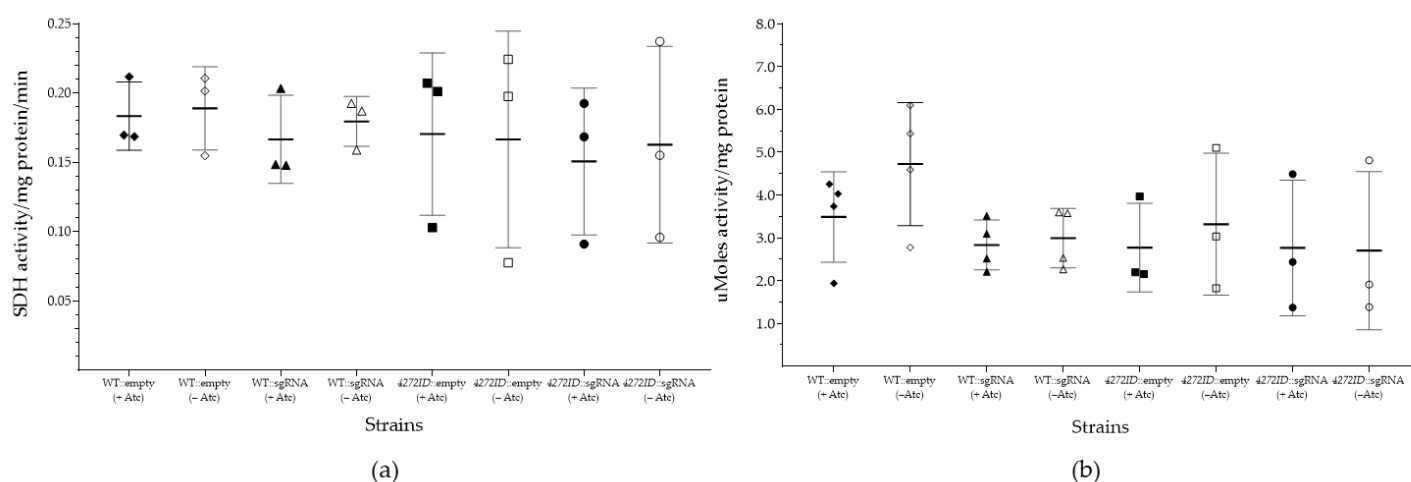

**Figure S2:** Activity of Fe-S cluster containing enzymes in *M. smegmatis* strains. The *M. smegmatis* strains WT::empty, WT::sgRNA, 4272ID::empty, and 4272ID::sgRNA were cultured in the presence and absence of Atc. Aliquots were taken after the cultures reached an OD<sub>600</sub> of ~0.6–0.8. The activity of (a) succinate dehydrogenase and (b) aconitase was measured per minute, for each milligram protein. Data represents the average, and error bars represent standard deviation, of three biological replicates. GraphPad Prism 8 software was used to determine the p-values using an unpaired t-test. Where appropriate, statistical significance is indicated by p<0.05 (\*), p<0.01 (\*\*), and p<0.001 (\*\*\*).

**Table S4:** Minimum inhibitory concentration for CRISPRi mediated *MSMEG\_4272* gene silencing in various *M. smegmatis* strains. Clofazimine and DMNQ MIC ranges are displayed in accordance with the standardised Broth-microdilution methods. The MIC ranges for Isoniazid are displayed as an extended range.

| <i>M. smegmatis</i> strains | Minimum Inhibitory Concentration ranges |                |                   |
|-----------------------------|-----------------------------------------|----------------|-------------------|
|                             | Clofazimine (µg/mL)                     | DMNQ (µg/mL)   | Isoniazid (µg/mL) |
| WT::empty (+Atc)            | 0.5 - 1                                 | 55.86 – 111.12 | 32 - 256          |
| WT::empty (–Atc)            | 0.5 - 1                                 | 55.86 – 111.12 | 32 - 256          |
| WT::sgRNA (+Atc)            | 0.25 – 0.5                              | 27.93 - 55.86  | 8 - 32            |
| WT::sgRNA (–Atc)            | 0.5 - 1                                 | 55.86 – 111.12 | 32 - 256          |
| 4272ID::empty (+Atc)        | 0.5 - 1                                 | 13.96 - 27.93  | 16 - 128          |
| 4272ID::empty (–Atc)        | 0.5 - 1                                 | 13.96 - 27.93  | 16 - 128          |
| 4272ID::sgRNA (+Atc)        | 0.25 - 0.5                              | 13.96 - 27.93  | 1 - 16            |
| 4272ID::sgRNA (–Atc)        | 1 - 2                                   | 55.86 – 111.12 | 8 - 256           |

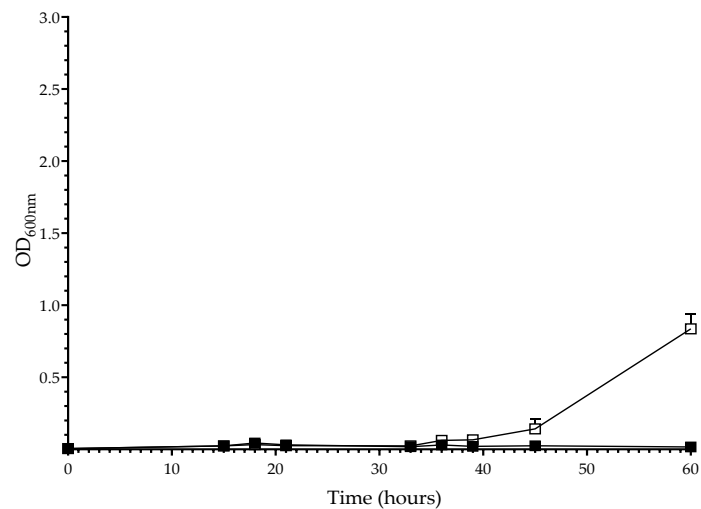

**Figure S3:** Growth of CRISPRi mediated *MSMEG\_4272* gene silencing in *M. smegmatis* strains under iron limiting culture conditions in modified MM Media. Growth of 4272ID::sgRNA in modified MM media supplemented with 2 µM iron, with and without Atc (solid & open square, respectively). Data represent the mean of three biological replicates and error bars indicate standard deviation.
